# Supplementary material for: Top–Down Proteomics of Human Saliva, Analyzed with Logistic Regression and Machine Learning Methods, Reveal Molecular Signatures of Ovarian Cancer
Source: MDPI journal article supplement (doi:10.3390/ijms242115716), 2023-10-28
Supplement: s1 [file s1]

**Supplementary Table S1.** Age and clinical pathological characteristics of the participants to the study, subdivided into Training and Testing sets.

DCIS: ductal carcinoma in situ. LCIS: lobular carcinoma in situ. NE: neuroendocrine. MaC: metastasis at time of sample collection. TNM: Classification of Malignant Tumours, by the Union for International Cancer Control. Empty cells denote absence of data.

| Patient No.         | Patient ID code | AGE                   | MaC | DIAGNOSIS                   | GRADE | T  | N | M | STAGE |
|---------------------|-----------------|-----------------------|-----|-----------------------------|-------|----|---|---|-------|
| <b>TRAINING SET</b> |                 | <b>OVARIAN CANCER</b> |     |                             |       |    |   |   |       |
| 1                   | 40C             | 77                    |     | serous                      | 3     |    |   |   |       |
| 2                   | 70C             | 67                    | x   | serous                      | 3     | 3c | 0 | X | IIIC  |
| 3                   | 90C             | 48                    | x   | serous                      | 3     | 3  | 1 | X | IIIC  |
| 4                   | 100C            | 43                    | x   | serous                      | 3     | 3  | x | X | IIIB  |
| 5                   | 220C            | 45                    | x   | solid                       | 3     | 3  | 1 | X | IIIC  |
| 6                   | 230C            | 66                    | x   | serous                      | 3     | 3c | 1 | X | IIIA  |
| 7                   | 240C            | 69                    | x   | serous                      | 3     | 1  | 1 | X | IIIA  |
| 8                   | 250C            | 56                    | x   | serous                      | 3     | 3c | 1 |   | IIIA  |
| 9                   | 260C            | 64                    |     | solid-tubular, endometrioid | 3     |    |   |   |       |
| 10                  | 270C            | 59                    | x   | serous                      |       |    |   |   |       |
| 11                  | 300C            | 77                    | x   | serous                      |       |    |   |   |       |
| 12                  | 340C            | 84                    | x   | solid                       |       |    |   |   |       |
| 13                  | 350C            | 52                    |     | serous                      |       |    |   |   |       |
| 14                  | 360C            | 49                    | x   | solid                       | 3     | 3  | 1 |   | IIIA  |
| 15                  | 490C            | 47                    |     | serous                      | 3     |    |   |   | IIIC  |

|    |       |    |   |                      |   |    |   |   |      |
|----|-------|----|---|----------------------|---|----|---|---|------|
| 16 | 50OC  | 61 | x | serous               | 3 |    |   |   |      |
| 17 | 53OC  | 55 | x | serous               | 3 |    |   |   |      |
| 18 | 59OC  | 71 |   | serous               |   |    |   |   | IIIC |
| 19 | 63OC  | 76 |   | serous               | 3 |    |   |   |      |
| 20 | 67OC  | 68 |   | endometrioid         | 2 | 1c | 0 | X | IA   |
| 21 | 71OC  | 60 | x | serous               | 1 |    |   |   |      |
| 22 | 81OC  | 66 |   | serous               | 1 |    |   |   |      |
| 23 | 84OC  | 71 |   | clear cells          |   | 1c |   |   |      |
| 24 | 89OC  | 46 | x | serous               | 3 | 3c | 1 |   | IIIC |
| 25 | 104OC | 70 |   | undifferentiated     |   |    |   |   |      |
| 26 | 106OC | 43 |   | serous               | 3 | 3  | X | X | IIIB |
| 27 | 107OC | 55 |   | serous               | 2 | 3b | X | X | IIIB |
| 28 | 113OC | 73 |   | clear cells          |   |    |   |   |      |
| 29 | 116OC | 61 |   | serous               | 3 | 3b | 0 | X |      |
| 30 | 136OC | 75 |   | high grade carcinoma | 3 | 3b | X | X | III  |
| 31 | 137OC | 78 |   | serous               | 3 | 2b | 0 | X | IIB  |
| 32 | 138OC | 62 |   | high grade carcinoma |   | 3c |   |   | IIIC |
| 33 | 141OC | 71 |   | serous               |   |    |   |   |      |
| 34 | 142OC | 69 |   | carcinoma            |   |    |   |   |      |
| 35 | 144OC | 57 |   | high grade carcinoma |   | 1b | X |   |      |

| TESTING SET |       |    |   |                |   |     |   |   |      |
|-------------|-------|----|---|----------------|---|-----|---|---|------|
| 1           | 117OC | 53 |   | granulosa      | 3 |     |   |   |      |
| 2           | 121OC | 51 |   | endometrioid   | 3 |     |   |   |      |
| 3           | 122OC | 60 |   | serous         | 3 | 2a  | 1 | 0 | IIIC |
| 4           | 125OC | 71 |   | serous         |   |     |   |   |      |
| 5           | 126OC | 71 |   | serous         | 3 | 3c  | 0 | X |      |
| 6           | 129OC | 69 |   | carcinoma      |   |     |   |   |      |
| 7           | 134OC | 53 |   | carcinosarcoma | 3 |     |   |   |      |
| 8           | 235OC | 65 | x | serous         | 3 | 3b  |   | X | IV   |
| 9           | 240OC | 50 |   | carcinoma      | 3 | 2b  | 0 |   | IIB  |
| 10          | 243OC | 67 |   | serous         |   | 1c2 | X |   | IC   |
| 11          | 245OC | 54 |   | carcinoma      | 3 | 3c  | X |   |      |
| 12          | 247OC | 65 |   | serous         | 3 | 3b  | 0 |   | IIIB |
| 13          | 248OC | 81 |   | serous         | 3 | 3c  |   |   | IIIC |
| 14          | 252OC | 70 |   | serous         | 3 |     |   |   |      |
| 15          | 253OC | 67 |   | carcinoma      | 3 | 3b  |   |   | IIIB |

| TRAINING SET  |     |    |  |        |   |    |   |  |     |
|---------------|-----|----|--|--------|---|----|---|--|-----|
| BREAST CANCER |     |    |  |        |   |    |   |  |     |
| 1             | 1BC | 56 |  | Ductal | 3 | 1c | 0 |  | IA  |
| 2             | 2BC | 69 |  | Ductal | 3 | 2  | 0 |  | IIA |

|    |       |    |   |                                |   |        |       |   |      |
|----|-------|----|---|--------------------------------|---|--------|-------|---|------|
| 3  | 3BC   | 51 | x | Ductal                         | 3 | 2mic   | 3a    | X | IIIC |
| 4  | 5BC   | 79 | x | Lobular                        | 1 | 3      | 1a    |   | IIIA |
| 5  | 6BC   | 67 |   | Ductal                         | 2 | 1bmic  | 0     |   | IA   |
| 6  | 8BC   | 39 | x | Ductal                         | 2 | 2 mic  | X     | X |      |
| 7  | 11BC  | 78 | x | Ductal                         | 2 | 1c     | 1     | 0 | IIA  |
| 8  | 12BC  | 57 |   | Ductal                         | 3 | 1c     | 0     | X | IA   |
| 9  | 13BC  | 87 |   | infiltrating, with NE features | 2 | 2      | 1a    |   | IIB  |
| 10 | 14BC  | 50 |   | Ductal                         | 2 | 2      | 1a    |   | IIB  |
| 11 | 15BC  | 77 |   | Lobular                        | 2 | 1c     | 0     |   | IA   |
| 12 | 186BC | 51 |   | Ductal                         | 2 | 2      | 3     | X | IIIC |
| 13 | 17BC  | 39 |   | Ductal+DCIS                    | 2 | 1c mic | 1 mic |   | IB   |
| 14 | 18BC  | 82 |   | Colloidal+DCIS                 | 2 | 1b mic | 0     |   | IA   |
| 15 | 19BC  | 64 |   | Lobular+DCIS+LCIS              | 2 | 1c     | 0     | X | IA   |
| 16 | 20BC  | 54 |   | Ductal+DCIS                    | 3 | 1c     | 1mic  |   | IB   |
| 17 | 21BC  | 55 |   | Ductal+DCIS                    | 3 | 2      | 3     | X | IIIC |
| 18 | 28BC  | 34 |   | Ductal+DCIS                    | 2 | 1c mic | 1 mic | X | IB   |
| 19 | 29BC  | 52 |   | Ductal                         | 1 | 2      | 1a    | X | IIB  |
| 20 | 31BC  | 68 |   | Ductal                         | 3 | 1c     | 0     | X | IA   |
| 21 | 32BC  | 65 |   | Lobular                        | 2 | 2mic   | 2     | X | IIIA |
| 22 | 22BC  | 56 | x | Ductal+lobular                 | 3 | 2mic   | 2a    | X | IIIA |

|    |      |    |  |                     |   |        |      |   |      |
|----|------|----|--|---------------------|---|--------|------|---|------|
| 23 | 37BC | 67 |  |                     |   |        |      |   |      |
| 24 | 38BC | 69 |  | Ductal              | 1 | 1c     | 0    |   | IA   |
| 25 | 39BC | 62 |  | Lobular             | 2 | 2 mic  | 3a   |   | IIIC |
| 26 | 40BC | 65 |  | Lobular             | 2 | 1c     | 0    |   | IA   |
| 27 | 41BC | 70 |  | Ductal+DCIS         | 3 | 1c     | 0    |   | IA   |
| 28 | 42BC | 52 |  | Ductal+lobular+DCIS | 2 | 1a mic | 1mic | X | IB   |
| 29 | 43BC | 50 |  | Ductal+DCIS         | 3 | 1c     | 1mic | X | IB   |
| 30 | 44BC | 71 |  | Ductal+DCIS         | 2 | 1b     | 0    |   | IA   |
| 31 | 93BC | 55 |  | Lobular             | 3 | 1c mic | 0    | X | IA   |
| 32 | 94BC | 57 |  | Ductal              | 3 | 1c     | 0    |   | IA   |
| 33 | 95BC | 41 |  | Ductal              |   |        |      |   |      |
| 34 | 97BC | 67 |  | Ductal+DCIS         | 2 | 1a     | 1    | 0 | IIA  |

#### TESTING SET

|   |      |    |   |                |   |        |    |   |      |
|---|------|----|---|----------------|---|--------|----|---|------|
| 1 | 45BC | 57 |   | Ductal         | 1 | 1a mic | 0  |   | IA   |
| 2 | 46BC | 70 |   | Lobular        | 2 | 1c     | 1  | X | IIA  |
| 3 | 47BC | 71 |   | Ductal         | 2 | 2      | 1a |   | IIB  |
| 4 | 51BC | 61 |   | Ductal+DCIS    | 2 | 1 mic  | 3  |   | IIIC |
| 5 | 52BC | 52 |   | Lobular+LCIS   | 2 | 2      | 1a |   | IIB  |
| 6 | 56BC | 69 | x | Ductal+lobular | 2 | 1b     |    |   |      |
| 7 | 58BC | 59 |   | Ductal+DCIS    | 2 | 2      | 1  | X | IIB  |

|    |      |    |   |                                   |                  |                    |                      |   |              |
|----|------|----|---|-----------------------------------|------------------|--------------------|----------------------|---|--------------|
| 8  | 60BC | 77 | x | infiltrating                      |                  |                    |                      |   |              |
| 9  | 61BC | 67 |   | Left: ductal; right: lobular+LCIS | Right:2; left: 2 | Right: 1c; left: 2 | Right: 0; left: 1mic |   | IA dx IIB sx |
| 10 | 62BC | 74 |   | Ductal+DCIS                       | 1                | 1b                 | 0                    |   | IA           |
| 11 | 68BC | 46 |   | Ductal                            | 2                | 1b mic             | 1a                   | X | IIA          |
| 12 | 69BC | 54 |   | Ductal                            | 3                | 2                  | 0                    | X | IIA          |
| 13 | 72BC | 64 |   | Lobular                           | 1                | 1b                 | 0                    |   | IA           |
| 15 | 73BC | 53 |   | Ductal+DCIS                       | 3                | 1c                 | 0                    |   | IA           |
| 15 | 80BC | 68 |   | Ductal                            | 3                | IS                 |                      |   |              |
